# Supplementary material for: Low-intensity pulsed ultrasound (LIPUS) prevents periprosthetic inflammatory loosening through FBXL2-TRAF6 ubiquitination pathway
Source: PubMed Central journal article supplement (PMC5381120; doi:10.1038/srep45779), 2017-04-05
Supplement: srep45779-s1.pdf [file srep45779-s1.pdf]

**Low-intensity pulsed ultrasound (LIPUS) prevents periprosthetic inflammatory loosening through FBXL2-TRAF6 ubiquitination pathway**

Xiang Zhao<sup>a,b,+</sup> PhD, Gangsheng Zhao<sup>c,+</sup> MD, Zhongli Shi<sup>a,b</sup> PhD, Chenhe Zhou<sup>a,b</sup> PhD, Yunlin Chen<sup>d</sup> MD, Bin Hu PhD<sup>a,b</sup>, and Shigui Yan<sup>a,b,\*</sup> MD

<sup>a</sup>Department of orthopaedic surgery, the second affiliated hospital, School of Medicine, Zhejiang University, Hangzhou, China

<sup>b</sup>Institute of orthopaedic research, Zhejiang University, Hangzhou, China

<sup>c</sup>Department of Orthopaedic Surgery, Yiwu Central Hospital, the affiliated hospital of Wenzhou Medical College, Yiwu, China

<sup>d</sup>Department of Orthopaedic Surgery, Ningbo sixth hospital, China

+ These authors contributed equally to this work.

**\*Corresponding to:** Shigui Yan, zrzwsj@163.com

**Supplementary table S1:** The primer used in this study

| Gene           | Forward Primer               | Reverse Primer               |
|----------------|------------------------------|------------------------------|
| $\beta$ -actin | 5'- CCGAGAATGGGAAGCTTGTC-3'  | 5'- AAGCACCAACGAGAGGAGAA-3'  |
| FBXL2          | 5'- CAGCCATCTTACGACACCAC-3'  | 5'- TTGCCAGAGAATCACCGTAG-3'  |
| TRAF6          | 5'- AAACGTGAGAACAGCTGCG-3'   | 5'- GCAGATGGGACACTCATACT-3'  |
| ERK1           | 5'- GAAAGCATTACCTTGACCAG -3' | 5'- CTTTGGAGTCAGCATTGGGG -3' |
| ERK2           | 5'- GGCATGGTTTGCTCTGCTTA -3' | 5'- TCAATGGTTGGTGCCCGGAT -3' |

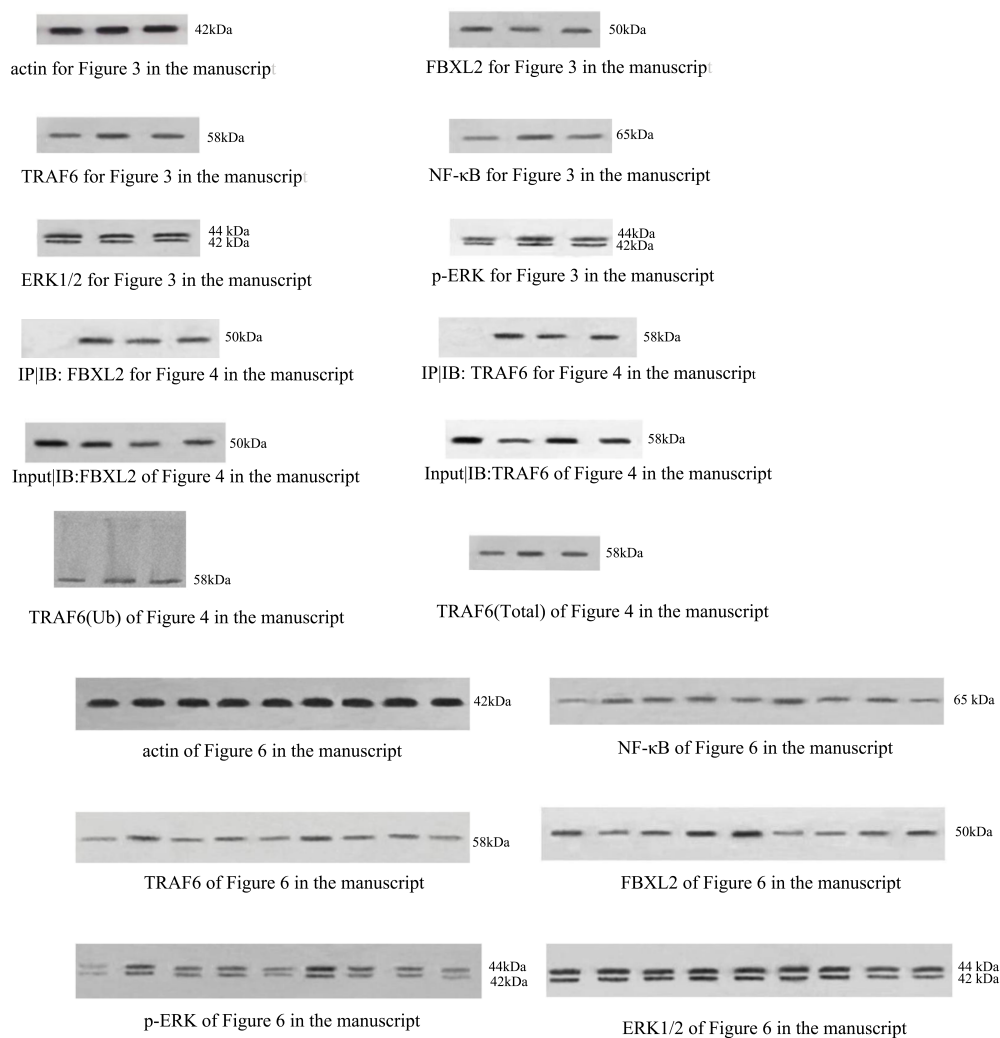

**Supplementary Figure S1:** the full-length blots used in the manuscript.
